1 **Estimating the global reduction in transmission and rise in detection capacity of the**  
2 **novel coronavirus SARS-CoV-2 in early 2020**

3 Antoine Belloir<sup>1</sup>

4 François Blanquart<sup>2,3</sup>

5 1. Ecole Polytechnique, Route de Saclay, 91120 Palaiseau, France.

6 2. Centre for Interdisciplinary Research in Biology (CIRB), Collège de France, CNRS, INSERM, PSL  
7 Research University, Paris, France.

8 3. Infection Antimicrobials Modelling Evolution, UMR 1137, INSERM, Université de Paris, Paris,  
9 France

10 **Abstract**

11 To better control the SARS-CoV-2 pandemic, it is essential to quantify the impact of control  
12 measures and the fraction of infected individuals that are detected. To this end we developed a  
13 deterministic transmission model based on the renewal equation and fitted the model to daily  
14 case and death data in the first few months of 2020 in 79 countries and states, representing  
15 more than 4 billions individuals. Based on a region-specific infected fatality ratio, we inferred  
16 the time-varying probability of case detection and the time-varying decline in transmissibility.  
17 The model was validated by the good correlation between the predicted total number of  
18 infected and that found in serosurveys; and most importantly by the strong correlation between  
19 the inferred probability of detection and the number of daily tests per inhabitant, with 50%  
20 detection achieved with 0.003 daily tests per inhabitants. Most of the decline in transmission  
21 was explained by the reductions in transmissibility (social distancing), which avoided 10<sup>7</sup>  
22 deaths in the regions studied over the first four months of 2020. In contrast, symptom-based  
23 testing and isolation was not an efficient way to control the spread of the disease, as a large  
24 part of transmission happens before symptoms and only a small fraction of infected individuals  
25 was typically detected. We developed a phenomenological model to link the number of daily  
26 tests with the probability of detection and verified the prediction that increasing test capacity  
27 increases the probability of detection less than proportionally. Together these results suggest  
28 that little control can be achieved by symptom-based testing and isolation alone.

29

## 30 **Introduction**

31 The coronavirus SARS-CoV-2 originated in November-December 2019 (1), appeared as a  
32 cluster of cases of pneumonia of unknown etiology in the Wuhan province in China in  
33 December 2019-January 2020, and subsequently spread in Asia, Europe, North America, and  
34 the rest of the world in 2020. The rapid doubling time associated with the basic reproductive  
35 number  $R_0$  at 2-3 (2-4), together with the fact that an estimated ~50% of transmission is  
36 presymptomatic (5,6) make it difficult to control. A substantial proportion of infected  
37 individuals need to be hospitalised: 1 to 18% with increasing age in China, 4% overall in France  
38 (7-9). The infected fatality ratio (IFR) is around 1%, and much higher in the elderly (7-10).

39 By early March 2020, many regions of the world had imposed strong social distancing  
40 measures to reduce transmission and contain the spread of SARS-CoV-2. These social  
41 distancing measures were varied and included school closure, business closure, partial or full  
42 lockdowns, stay-at-home order, the prohibition of gatherings, curfews, etc. These measures  
43 resulted in the stabilisation or the inversion of the epidemic curve in many countries (11). This  
44 was accompanied by an increase in the capacity to PCR-test potentially infected individuals.

45 To improve the control of the epidemic, it is necessary to understand the transmission dynamics  
46 during the period of unrestricted growth in the first few months of 2020, and the impact of the  
47 subsequent reduction in transmission owing to (i) the depletion of susceptible individuals, (ii)  
48 the social distancing measures implemented, (iii) tests and isolation of cases. We develop a  
49 dynamical epidemiological model that describes the transmission dynamics with a discrete-  
50 time renewal equation. Thanks to published estimates of the IFR, our model predicts the daily  
51 number of all cases and the fraction of detected cases, and the daily number of deaths over the  
52 course of the epidemic and can thus be readily fit to data from 79 countries, states and  
53 provinces. Within each of these regions, we infer the time-varying probability of detection; the  
54 time-varying transmissibility; and we deduce the impact of detection and case isolation on  
55 transmission dynamics. The model is validated by the strong correlation between the predicted  
56 attack rate and that found in serological surveys. Finally, we show that the capacity to detect  
57 SARS-CoV-2 infections is strongly related to the number of tests performed per inhabitant,  
58 develop a novel model that relate the number of tests to the probability of detection and verify  
59 the model predictions. These results will serve to better understand and control transmission  
60 dynamics.

61 **Results:**

62 We model the dynamics of SARS-CoV-2 transmission for 79 geographical zones (countries,  
63 USA states, Canadian provinces and the Hubei province in China; hereafter “regions”) with a  
64 discrete-time renewal equation that describes how individuals are infected each day by  
65 transmission from previously infected individuals (Methods). Our model is akin to an existing  
66 model that predicts the daily number of deaths (11). The adapted renewal equation we use  
67 predicts in a deterministic way the daily numbers of infected, cases recorded, and deaths, given  
68 temporal profiles of transmissibility and case detection.

69 Infected individuals may die with a constant probability called the infected fatality ratio (IFR).  
70 We fix both the IFR and the distribution of time to death to values previously estimated from  
71 data from mainland China (8). The inference of the number of infected and hence the  
72 probability of detection crucially relies on the IFR, which links the daily deaths with the past  
73 number of infected individuals . The IFR is difficult to estimate because case detection is biased  
74 towards more severe cases. Early estimates relied on settings where tests were exhaustive such  
75 as repatriation flights or the Diamond Princess cruise boat (7,8,12). We use one of the published  
76 estimates of age-dependent IFR ((12); similar to other estimates, Supplementary Fig. 1) to  
77 compute a region-specific IFR that takes into account the regional age distribution. This region-  
78 specific IFR ranges from 0.3-0.4% (Bangladesh, Egypt, Pakistan, Philippines, South Africa) to  
79 1.2%-1.4% (Germany, Italy, Portugal, Spain), and is typically around 1% in the regions  
80 examined (median 0.94%). The IFR and the distribution of the time from infection to death  
81 allows us to project back in time the number of infected individuals.

82 We fit jointly the number of cases and deaths. This strategy has two advantages. While the  
83 number of deaths may be small, the number of cases is typically much larger and less subject  
84 to stochastic fluctuations. Furthermore, cases give an early signal of potential changes in  
85 transmissibility, as infected individuals may be detected as soon as symptoms occur, about a  
86 week after infection, while death occurs much later, about four weeks after infection on  
87 average. The number of recorded cases, however, depends on the intensity of testing and the  
88 testing strategy. We account for changes in intensity of testing by modelling and inferring a  
89 time-varying probability of case detection. We can thus interpret the number of cases recorded  
90 jointly with the number of deaths. Case detection is assumed to happen typically a few days  
91 after symptom onset, as inferred from (13), and to be followed by perfect isolation. Isolation  
92 reduces the pool of infected individuals who contribute to transmission (Methods).

93 From the renewal equation framework predicting the daily number of cases and deaths, we  
94 infer the time-varying transmission rate and the time-varying detection probability in the 79  
95 studied regions. The chosen regions are those where the daily death incidence had reached 10  
96 deaths at least once as of 23<sup>rd</sup> April 2020 according to the John Hopkins Coronavirus Resource  
97 Center database. We fit the model by maximum likelihood to the case and death count data  
98 assuming the data points each day are drawn in a negative binomial distribution with mean  
99 given by the model prediction, and with an inferred dispersion parameter.

100 We validate our projections by comparing the inferred total attack rates—the proportion of  
101 individuals in the population that have ever been infected at a given date—with the number of  
102 infected individuals in nine regions where the number of infected at a certain time is known by  
103 systematic survey on a representative sample. The attack rate is given by the result of  
104 seroprevalence surveys, where a seropositive individuals is assumed to have been infected no  
105 later than 13 days in the past, corresponding to the median time to seroconversion (14). Note  
106 that in one case (Austria) we use results from a systematic PCR test survey. In that one case a  
107 positive individual is assumed to have been infected in the interval from 20 to 4 days ago (15)  
108 The attack rate predicted by our analysis was generally close to that in the data (Fig. 1), with  
109 no systematic bias. Countries above the identity line have more positive individuals in reality  
110 than predicted by the model. For these countries the true IFR is lower than the one assumed:  
111 given the realised number of deaths, the country actually had more infected individuals than  
112 what the model predicts. On the contrary, countries below the identity line have a higher IFR  
113 than the one assumed. Deviations of the true IFR from that assumed in the model bias the  
114 estimated absolute value of the detection probability, but not the temporal trends in the  
115 detection probability.

116 To study the change in transmission following social distancing measures, one could infer the  
117 effects of different types of measures such as business, school, bar and restaurant closures,  
118 banning large gatherings, lockdowns, etc. However, these measures and their implementations  
119 are very varied across regions and multiple measures are often implemented simultaneously  
120 and may be accompanied by undocumented behavioural changes, complicating the inference  
121 of effects of individual measures (11). Instead, we estimate a region-specific reduction in  
122 transmissibility. We test two functional forms for the decline in transmissibility: (i) a sharp  
123 reduction in transmissibility at the date of the strongest social distancing measure. This was in  
124 most cases a national (or state-wise) lockdown (65 regions), regional lockdowns (5 regions:  
125 Algeria, Brazil, Indonesia, Oklahoma, Russia) or a variety of distancing measures with no strict

126 lockdown (9 regions: British Columbia, Canada, Chile, Dominican Republic, Egypt, Iran,  
 127 Ontario, Sweden, Turkey); (ii) a smooth sigmoid reduction in transmissibility. When  
 128 comparing the fit of the two models with the Akaike Information Criterion (AIC), the smooth  
 129 reduction in transmissibility fitted that data better (an AIC difference greater than 4) in 50  
 130 regions out of 79. In these cases the reduction in transmissibility predated the date of the  
 131 strongest social distancing measure by 5 to 20 days (Supplementary Fig. 3). In the 29 other  
 132 regions, both functional forms were similar (Supplementary Fig. 2).

133 In most regions, we find a strong reduction in transmissibility accompanied by an increase in  
 134 detection capacity. The basic reproduction number  $R_{0,t}$  decreased from 3.7 on average across  
 135 countries at the first date when 5 daily cases were reached, to 0.98 as of 8th of May (Fig. 2B).  
 136 There is substantial variation in the inferred initial transmissibility across regions. The mean  
 137 probability of detection increased from 4% to 29% over the same period (Fig. 2C). The  
 138 transmissibility remained above 1 (the threshold above which the epidemic expands in the  
 139 absence of other measures) in several regions as of 8th May, including Minnesota, Brazil,  
 140 Mexico, Pakistan, South Africa (Fig. 3A). The type of social distancing measure (national  
 141 lockdown, regional lockdown, distancing) did not affect the final transmissibility (linear model  
 142 for the final transmissibility as a function of the distancing measure;  $p=0.46$ ). The probability  
 143 of detection as of 8th May was below 50% for 67 out of 79 regions (Fig. 2B). The model  
 144 predicted an attack rate of infection across regions of 0.1% (India) to 15% (New Jersey, USA).

145 Factors contributing to the reduction to transmission: The effective reproduction number  
 146  $R_{t_{final}}^E$  on the 8th of May ( $t_{final}$ ), including the impacts of detection and isolation and immunity  
 147 may be written as the product of the initial basic reproduction  $R_{0,t_{init}}$  number times three  
 148 factors that all reduce transmission:

$$149 \quad R_{t_{final}}^E = R_{0,t_{init}} \underbrace{\left(1 - \mathcal{A}_{t_{final}}\right)}_{\text{(i) immunity}} \underbrace{\left(1 - \mathcal{B}_{t_{final}}\right)}_{\text{(ii) reduced transmissibility}} \underbrace{\left(1 - \mathcal{C}_{t_{final}}\right)}_{\text{(iii) detection and isolation}}$$

150 with  $\mathcal{A}_{t_{final}} = I_{t_{final}}^{tot}/S_0$ ,  $\mathcal{B}_{t_{final}} = 1 - R_{0,t_{final}}/R_{0,t_{init}}$ , and  $\mathcal{C}_{t_{final}} \propto c_{t_{final}}$  (Material and  
 151 Methods). The reduction in overall transmission depends on (i) the depletion of the pool of  
 152 susceptibles, (ii) reduced transmissibility impacting the basic reproduction number  $R_{0,t}$ , (iii)  
 153 testing and case isolation. We found that the factor contributing most to reduced transmission  
 154 is the reduced transmissibility (Fig. 4B).

155 The reduction in transmission owing to population immunity depends on the total number of  
156 individuals ever infected  $I_{t_{final}}^{tot}$  (the attack rate) over the initial number of susceptible  
157 individuals  $S_0$ , assumed to be the total population size of the region. The attack rate was smaller  
158 than 2% in 47 regions out of 79. The reduction in the number of susceptible individuals that  
159 could lead to herd immunity is thus very small in most regions, assuming that all individuals  
160 are initially susceptible. The second factor is estimated from the inferred sigmoid curve for  
161  $R_{0,t}$ . The third factor is estimated assuming that case detection is followed by strict isolation,  
162 such that a detected case stops transmitting and the generation time is effectively truncated  
163 (Fig. 4A). This assumption is compatible with evidence that generation times are shortened by  
164 case isolation (16,17). With our set of parameters, the reduction owing to detection and  
165 isolation is approximately  $C_{t_{final}} = 0.46 c_{t_{final}}$ . That is, on average detection and isolation  
166 only prevents 46% of transmission of a detected individual. The resulting reduction in  
167 transmission caused by detection and isolation is typically small (even under the conservative  
168 assumption that all detected individuals are perfectly isolated) because a small fraction of  
169 infected individuals is detected, and because individuals are detected a few days after  
170 symptoms when about half of the transmission already occurred (5,6).

171 To estimate the number of deaths averted by social distancing from the beginning of the  
172 epidemic to May 8<sup>th</sup>, we simulated the epidemic in the absence of social distancing measures,  
173 i.e. when transmissibility remains constant at its inferred initial value. The difference between  
174 the simulated number of deaths and the true reported number of deaths is the number of deaths  
175 averted. The reductions in transmissibility from the beginning of the epidemic to May 8<sup>th</sup>  
176 avoided in total across these regions  $9.8 \times 10^6$  deaths, and of the order of  $10^4$  to  $10^6$  deaths per  
177 country. Brazil, Mexico and large European countries (France, Germany, Italy, Spain, United  
178 Kingdom) avoided 5 to  $8 \times 10^5$  deaths. A previous study of 11 European countries reported  
179 figures similar to ours ( $4.7$  to  $7.2 \times 10^5$  deaths avoided in the five aforementioned countries  
180 (11)).

181 Mobility as a correlate of transmission: the inferred time-varying transmissibility correlated  
182 with indicators of mobility. This has been evidenced in other studies in the USA (18,19).  
183 Precisely, we use the Google COVID-19 Community Mobility Reports which record the  
184 presence of individuals each day at six types of location: grocery & pharmacy, parks, transit  
185 stations, retail & recreation, residential, and workplaces, for most regions studied here (with  
186 the exception of Algeria, the Hubei province in China, Iran, Morocco, Russia, Ukraine). We  
187 used a multivariate linear mixed model to fit the reduction in transmissibility compared to

188 baseline, as a function of the reduction in mobility indicator compared to baseline, in each  
 189 country, at each day. The multivariate model corrects for the correlations between the different  
 190 mobility indicators. The model includes mobility as a fixed effect, and region as a random effect  
 191 affecting both the intercept and the slope of the relation. Interestingly, we found a correlation  
 192 between transmissibility and all indicators, and particularly mobility in transit stations (public  
 193 transport hubs such as subway, bus, and train stations). The model had a coefficient of  
 194 determination of 93%. A reduction in the mobility in transit stations compared to baseline  
 195 approximately translated in the same reduction in transmissibility (Table 1). This correlation  
 196 was found in the whole dataset, in the subset of European countries, and in the subset of USA  
 197 states.

198

| Dataset / model | Grocery / pharmacy    | Parks                        | Transit stations          | Retail & recreation  | Residential           | Workplaces           |
|-----------------|-----------------------|------------------------------|---------------------------|----------------------|-----------------------|----------------------|
| full            | -0.06 [-0.27 ; 0.15]  | <b>-0.14</b> [-0.17 ; -0.1]  | <b>1.02</b> [0.82 ; 1.21] | 0.13 [-0.08 ; 0.34]  | -0.26 [-0.46 ; -0.06] | -0.02 [-0.15 ; 0.11] |
| USA states      | -0.27 [-0.39 ; -0.15] | <b>-0.2</b> [-0.25 ; -0.15]  | <b>1.31</b> [0.95 ; 1.64] | 0.17 [-0.12 ; 0.44]  | 0.02 [-0.51 ; 0.53]   | -0.26 [-0.52 ; 0.02] |
| Europe          | 0.33 [-0.03 ; 0.63]   | <b>-0.12</b> [-0.16 ; -0.09] | <b>1.02</b> [0.8 ; 1.24]  | -0.14 [-0.43 ; 0.16] | -0.1 [-0.34 ; 0.15]   | 0.36 [0.2 ; 0.53]    |

199 Table 1: Regression coefficients for the temporal relationship between transmissibility  
 200 and each of the mobility indicators, in the full dataset, the USA states, and European  
 201 countries. 95% confidence intervals indicated in parenthesis. Consistent and significant  
 202 effects are highlighted.

203 Relationship between probability of detection and intensity of testing:

204 We last relate the time-varying probability of detection to the intensity of testing. First, we  
 205 correlate the probability of detection (as of May 8<sup>th</sup>) with the number of tests performed by  
 206 inhabitants *across regions*. We did so for 62 regions where test data were available. There was  
 207 a strong correlation between probability of detection and number of tests per inhabitants  
 208 (regression coefficient  $\beta = 161$  per daily test per inhabitant,  $p = 4.0e-5$ ) (Fig. 5B).

209 Second, to examine further how the changing number of tests affects the probability of  
 210 detection *within a region and across time*, we formulated a simple model of symptom-based  
 211 testing. The goal of this model is to relate within a region the number of tests conducted on a  
 212 given day (called  $T_t$ ) with the inferred probability of detection on that day ( $c_t$ ). We assume that  
 213 in the period when the incidence of infections is much higher than the number of tests, the  
 214 decision to test individuals for SARS-CoV-2 is made on the basis of a set of symptoms. We do  
 215 not consider contact tracing, as during that period and in the countries examined the number of

216 infected individuals was too large for this intervention to be practically implemented. The set  
 217 of symptoms defines a score. SARS-CoV-2 infected and uninfected individuals present two  
 218 distinct distributions of this score, such that the probability that the individual is truly infected  
 219 with SARS-CoV-2 increases with this score. Tests are prioritised on individuals with the  
 220 highest score. This model thus reproduces the fact that the fraction of positive tests increases  
 221 when tests are more limited compared to the number of infected individuals. For simplicity,  
 222 we additionally assume that the score in infected and uninfected individuals follows  
 223 exponential distributions with two distinct rates. Under this model, the probability of detection  
 224 is given by the solution  $c_t$  of:

$$225 \quad T_t = P_t c_t + N c_t^\gamma$$

226 (Material and Methods). In this equation, the variable  $T_t$  is the total number of tests conducted  
 227 at day  $t$ .  $P_t$  and  $N$  are the number of SARS-CoV-2 infected and non-infected individuals  
 228 seeking care at day  $t$ , and who could potentially be tested if the number of tests available allows.  
 229  $P_t$  is the time-delayed number of infected individuals given by  $P_t = \sum_{\tau=0}^{\infty} y(\tau) I(t, \tau)$  where  
 230  $y(\tau)$  is the probability that an individual is detected  $\tau$  days after infection (when it is detected),  
 231 while  $N$  is assumed to be constant over the considered period. The parameter  $\gamma > 1$  describes  
 232 the distribution of the symptom score in infected individuals relative to that in uninfected  
 233 individuals. There is no closed form solution for the general solution  $c_t$ , but when the  
 234 distribution of the score is dominated by negative individuals, the probability of detection is  
 235 approximately a root function of the number of tests:

$$236 \quad c_t = \left(\frac{T_t}{N}\right)^{1/\gamma}$$

237 The probability of detection should thus generally increase sublinearly with the number of tests  
 238 since  $\gamma > 1$ , and at best, should be proportional to the number of tests (when  $\gamma = 1$ ). This is  
 239 because tests are prioritised on individuals that are more likely to be infected; as the number of  
 240 tests increases, the probability of positivity decreases. We also predict that in general, when  
 241 the number of infected is large, the probability of detection decreases with the number of  
 242 infected individuals (Material and Methods).

243 Both predictions were verified in data (Fig. 5). We inferred for each region the best-fitting pair  
 244 of parameters  $(N, \gamma)$  to relate the inferred probability of detection  $c_t$  to the number of tests  $T_t$ ,  
 245 using both the approximated and the general model. We found that  $\gamma > 1$  for most regions,  
 246 implying a sublinear relationship as predicted (Fig. 5C). The general model where the



247 probability of detection decreased with the number of testable infected individuals was a better  
248 fit only when the attack rate was high, for example in New York state (Fig. 5D, Supplementary  
249 Fig. 8).

## 250 **Discussion**

251 We developed a discrete time renewal equation model to describe the dynamics of SARS-CoV-  
252 2 infections. We fitted this model to the daily cases and deaths in a large number of countries  
253 and states (together representing more than four billions individuals), with the following  
254 results:

- 255 (i) Transmissibility declined in all 79 regions examined. The best-fit decline in  
256 transmissibility was often smooth, with the decline in transmissibility predating the date  
257 of the lockdown. This could be due to non-pharmaceutical interventions implemented  
258 before the full lockdown or other behavioural changes. However, the decline in  
259 transmissibility as of May 8<sup>th</sup> was not enough to contain the epidemic in a number of  
260 regions.
- 261 (ii) The probability of case detection increased, was on average 29% across regions as of  
262 May 8<sup>th</sup>, and very rarely above 50%.
- 263 (iii) Epidemic control was achieved mainly through reductions in transmissibility brought  
264 about by social distancing. Case detection and isolation had a limited impact (Fig. 4B),  
265 even under the conservative assumption that case detection is followed by perfect  
266 isolation. Only a small proportion of cases are detected and about half of the  
267 transmission happens before symptom onset. We emphasise that in this period most  
268 testing was based on symptoms and not on past contacts with infected individuals. The  
269 build-up of immunity in infected individuals also had a very limited impact because the  
270 fraction of individuals infected remains small in all regions. Social distancing in the  
271 regions considered (totalling more than 4 billions inhabitants) avoided almost 10  
272 millions deaths from the beginning of the epidemic to May 8<sup>th</sup>.
- 273 (iv) Transmissibility correlated with mobility indicators, and most notably with the  
274 presence of individuals in transit stations, both in Europe and in the USA.
- 275 (v) The inferred probability of detection correlated with the number of tests per capita  
276 across regions. However, increasing the number of tests does not proportionally  
277 increase the probability of detection. This is explained by the fact that tests are  
278 prioritised on individuals most likely to be infected.

279 Our model and inference rely on several assumptions. First of all, we describe transmission  
280 dynamics within a simplified model that does not take into account age structure or household  
281 structure. These forms of structure may be weak enough that they can be neglected when  
282 describing the overall epidemic trajectory (20). Second, to infer jointly the time-varying  
283 transmissibility and probability of detection within a dynamical model, we assumed the  
284 temporal change took specific sigmoid functional forms. This differs from other approaches  
285 which estimate daily transmissibility as the incidence at a given day divided by past incidence  
286 weighted by the distribution of the generation time (21,22). These alternative approaches are  
287 more flexible in that they can infer any pattern of time-varying transmissibility. However, they  
288 cannot account exactly for the delay in case reporting, and can be very sensitive to noise in the  
289 data (21). Fitting a dynamical model with imposed functional forms for transmissibility and  
290 probability of detection reduces the sensitivity of inference to noise in the data. Third, and most  
291 importantly, inference relies on daily deaths and cases. Deaths are assumed to be perfectly  
292 reported. Cases are assumed to be partially reported with a time-varying detection probability.  
293 The inferred absolute value of the probability of detection of course strongly relies on the  
294 assumed IFR at around 1% on average (and tuned to the specific age structure of each region  
295 considered). The approach was validated in a number of regions where systematic test or  
296 seroprevalence surveys were conducted (Fig. 1). It is possible that in some of the other regions  
297 examined the number of deaths was greatly under-reported, in which case the true number of  
298 infected would be much higher than predicted, and the probability of case detection much  
299 smaller. However this should not affect the temporal trends in transmissibility or probability  
300 of detection, provided that under-reporting is constant in time. Other emerging seroprevalence  
301 surveys will give more information on the IFR (or death under-reporting) across regions, but it  
302 is notable that the early estimate of IFR in mainland China (8) already allow good predictions  
303 (Fig. 1). Lastly, our framework does not take into account the possibility that the IFR changes  
304 in time. Such temporal variation in IFR could be caused by overwhelmed health systems  
305 (increasing IFR) or better social distancing in at-risk groups (decreasing IFR).

306 Our method has several advantages. The discrete-time renewal equation makes the minimal  
307 assumptions that the transmissibility of an infected individual depends on the age of infection.  
308 It allows arbitrary distributions of the generation time, and arbitrary delays between infection  
309 and case detection, and infection and death. The distributions of these delays determines the  
310 dynamics of the changes in number of cases and deaths following a change in transmissibility.  
311 Parameters can be inferred using multiple time series, improving the precision of inference.

312 The daily cases, although dependent on the number of tests available, give an earlier signal of  
313 changes in transmissibility than the daily deaths, and suffer less from stochastic effects. The  
314 method allows different transmissibility for detected cases (here assumed to be zero, i.e. perfect  
315 isolation after detection). This is particularly relevant for accurate inference of transmissibility,  
316 as non-pharmaceutical interventions shorten the serial interval (fig. 4A) (17). Lastly, the  
317 framework quantifies the immunity acquired by infected individuals.

318 The probability of detection as a function of time in different countries was computed by  
319 different means in another study (23). Their statistical approach was based on estimating the  
320 case fatality ratio (CFR) adjusted for the delay between infection and deaths, and comparing  
321 with the baseline infected fatality ratio estimated in other studies that account for under-  
322 reporting (assumed to be 1.4% in their case). Their statistical method allows inferring arbitrary  
323 temporal variations in the probability of detection. However, it does not explicitly model the  
324 dynamics of transmission. It is unclear how the changing age-of-infection structure of the  
325 population upon reductions in transmission will affect the relationship between daily number  
326 of deaths and past number of cases, hence the inferred probability of detection, in their  
327 approach.

328 We found that tests based on symptoms detected only a small proportion of cases. Our model,  
329 importantly, applies in settings where the number of tests is much smaller than the number of  
330 individuals presenting to health systems with symptoms suggestive of SARS-CoV-2 infections.  
331 Increasing the number of tests does not proportionally increase the proportion of detected  
332 individuals. As a consequence of the typically small probability of detection, together with the  
333 fact that around half of the transmission is pre-symptomatic, tests followed by isolation of  
334 positive cases had very little impact on transmission, and are not sufficient by themselves to  
335 control an epidemic with a basic reproductive number of 3 or more. Tracing and testing the  
336 contacts of positive cases—a strategy that is not described by our model—identifies a pool of  
337 individuals with a 5-10% chance of being positive, up to 10-15% for household contacts  
338 (16,24,25). Identification of positive cases through widescale contact-tracing could thus  
339 modify the relationship between probability of detection and number of tests and in particular  
340 make it more linear. Furthermore, these contacts are isolated earlier than those identified  
341 through symptom-based testing (5,26). For these two reasons, contact-tracing and testing is a  
342 more efficient way to control the epidemic than symptom-based testing. Thus, if the capacity  
343 to trace contacts is limited, the epidemic may be out control as soon as the daily incidence is  
344 too large to trace a good fraction of contacts. This pleads for the use of digital contact tracing

345 apps and/or rapid implementation of additional social distancing measures when incidence  
346 increases.

347 Lastly, the inferred time-varying transmissibility correlated with mobility indicators (19,27).  
348 More precisely, within a multivariate framework we found that the mobility in transit stations  
349 was the most highly correlated with transmissibility, a pattern consistent in European countries  
350 and the USA (Table 1), and with a regression coefficient close to 1 (a given reduction in  
351 mobility corresponds to an equivalent reduction in transmission). The mobility in transit  
352 stations could be a general indicator of economic / social activity resulting in more  
353 transmission. Public transports could also be a common context of transmission. In support of  
354 our finding, individual use of public transport in Maryland was strongly associated with SARS-  
355 CoV-2 positivity (28).

356 In conclusion, we developed a framework to estimate time-varying transmissibility and  
357 probability of detection from daily cases and deaths in a large number of countries and regions.  
358 In the first few months of 2020, control of the epidemic was achieved mostly by reductions in  
359 transmissibility, which avoided 10 millions deaths in these 79 regions (representing more than  
360 half of the world's population), while case detection and isolation comparatively had a much  
361 smaller effect.

362

363 **Methods:**

364 Deterministic transmission dynamics:

365 To model transmission dynamics, we use a discretised version of the renewal equation (e.g.  
 366 (11)). We follow the dynamics of the number of individuals infected at day  $t$  who were infected  
 367  $\tau$  days ago, and have not yet been detected and isolated, called  $I(t, \tau)$ . The transmission  
 368 dynamics are given by the system of recurrence equations:

369 
$$I(t + 1, 0) = R_{0,t} (1 - I_t^{tot}/S_0) \sum_{\tau=0}^{\infty} w(\tau) I(t, \tau) \quad (1a)$$

370 
$$I(t + 1, \tau) = I(t, \tau - 1)(1 - c_t y(\tau - 1)) \forall \tau \geq 1 \quad (1b)$$

371 The first equation represents transmission to new susceptible individuals giving rise to infected  
 372 individuals with age of infection 0. The parameter  $R_{0,t}$  reflects transmissibility, and is the basic  
 373 reproduction number (in the absence of interventions, and when the population is fully  
 374 susceptible, i.e.  $I_t^{tot} = 0$ ). The factor  $w(\tau)$  is the fraction of transmission that occurs at age of  
 375 infection  $\tau$ , where  $\sum_{\tau=0}^{\infty} w(\tau) = 1$ . Thus  $w(\tau)$  represents the distribution of the generation time  
 376 of the virus. The infectiousness profile of the virus is linked with the generation time  
 377 distribution through  $\beta(\tau) = R_{0,t} w(\tau)$ . Transmission is reduced by a factor  $1 - I_t^{tot}/S_0$  by  
 378 population immunity, where  $S_0$  is the initial number of susceptible individuals in the region,  
 379 assumed to be the total population size. The variable  $I_t^{tot} = \sum_{i=1}^t I(i, 0)$  is the total number of  
 380 individuals already infected and assumed to be fully immune at time  $t$ . The instantaneous  
 381 reproduction number that accounts for population immunity but not for case isolation is  $R_t =$   
 382  $R_{0,t} (1 - I_t^{tot}/S_0)$ .

383 The second equation (1b) represents the dynamics of individuals infected in the past.  
 384 Individuals infected  $\tau - 1$  days ago are now of age of infection  $\tau$ , provided they were not  
 385 detected and isolated. An infected individual is detected with time-varying probability  $c_t$ , and  
 386 the probability that an individual is detected at age  $\tau$  (when it is detected) is given by  $y(\tau)$ ,  
 387 with  $\sum_{\tau=1}^{\infty} y(\tau) = 1$ . An individual who is detected is removed from the pool of individuals  
 388 that contribute to further transmission of the disease. The total number of cases detected at day  
 389  $t$  is thus:

390 
$$C(t) = c_t \sum_{\tau=0}^{\infty} y(\tau) I(t, \tau) \quad (2)$$

391 And the number of detected individuals who were infected  $\tau$  days ago changes as:

392 
$$C(t + 1, 0) = 0 \text{ (when } \tau = 0) \quad (3a)$$

393 
$$C(t + 1, \tau) = C(t, \tau - 1) + c_t I(t, \tau - 1) y(\tau - 1) \quad \forall \tau \geq 1 \quad (3b)$$

394 The total number of infected individuals, be they undetected or detected, that we may call  
 395  $A(t, \tau) = I(t, \tau) + C(t, \tau)$ , follows the equations:

396 
$$A(t + 1, 0) = R_{0,t} (1 - I_t^{tot}/S_0) \sum_{\tau=0}^{\infty} w(\tau) I(t, \tau) \quad (4a)$$

397 
$$A(t + 1, \tau) = A(t, \tau - 1) \quad (4b)$$

398 The fact that incidence (in the first equation) only depends on undetected cases  $I(t, \tau)$  emerges  
 399 from the assumption that detected individuals  $C(t, \tau)$  do not transmit.

400 While in the absence of testing and isolation, the infectiousness profile is given by  $\beta(\tau) =$   
 401  $R_{0,t} w(\tau)$  (with  $R_{0,t} = \sum_{\tau=0}^{\infty} \beta(\tau)$ ), detection and isolation truncates the infectiousness profile  
 402 at the time of detection  $t_d$  (Fig. 4A) with probability  $c_t y(t_d)$  where  $t_d$  is the time of detection.  
 403 In other words, the effective infectiousness profile is the mixture distribution:

404 
$$\beta_E(\tau) = (1 - c_t) R_{0,t} w(\tau) + c_t R_{0,t} \sum_{t_d=0}^{\infty} y(t_d) w(\tau) \mathbb{I}_{\tau \leq t_d} \quad (5)$$

405 where  $\mathbb{I}_{\tau \leq t_d}$  is an indicator variable equal to 1 when  $\tau \leq t_d$ , and 0 otherwise.

406 Probability of dying and time to death given infection:

407 The probability that an infected individual dies is the Infected Fatality Ratio (IFR) denoted  $d$ ,  
 408 assumed to be constant over time. The probability of dying  $\tau$  days after infection, given that  
 409 one dies, is given by  $x(\tau)$ . The mean number of deceased individuals at day  $t$  is then given by:

410 
$$D(t) = d \sum_{\tau=0}^{\infty} x(\tau) (I(t, \tau) + C(t, \tau)) \quad (6)$$

411 As death typically occurs at a time when the infected individual does not transmit any longer,  
 412 and the probability of dying is small (of the order of 1%), we neglect the impact of death on  
 413 transmission.

414 Effects of detection and isolation, change in transmissibility and immunity on transmission

415 We call ‘‘effective reproduction number’’  $R_{0,t}^E$  the instantaneous reproduction number taking  
 416 into account immunity and case isolation is given by (see also (29)):

417 
$$R_{0,t}^E = \sum_{\tau=0}^{\infty} \beta_E(\tau) = R_{0,t} \left[ \underbrace{(1 - c_t)}_{\text{undetected}} + c_t \underbrace{\sum_{t_d=0}^{\infty} y(t_d) \sum_{\tau=0}^{t_d} w(\tau)}_{\text{detected at time } t_d} \right] \quad (7a)$$

418 For example, an individual detected at day 0 only infects  $R_{0,t} w(0)$  individuals on average.  
 419 Equation (6a) can be rewritten as:

420 
$$R_{0,t}^E = \sum_{\tau=0}^{\infty} \beta_E(\tau) = R_{0,t} [1 - c_t \sum_{t_d=0}^{\infty} y(t_d) (\sum_{\tau=t_d+1}^{\infty} w(\tau))] \quad (7b)$$

421 Thus, the effective reproduction number  $R_{t_{final}}^E$  on the 8th of May ( $t_{final}$ ), including the impacts  
 422 of detection and isolation and immunity may be written as the product of the initial basic  
 423 reproduction number, times three factors that all reduce transmission:

424 
$$R_{t_{final}}^E = R_{0,t_{init}} \underbrace{\left(1 - \mathcal{A}_{t_{final}}\right)}_{\text{(i) immunity}} \underbrace{\left(1 - \mathcal{B}_{t_{final}}\right)}_{\text{(ii) reduced transmissibility}} \underbrace{\left(1 - \mathcal{C}_{t_{final}}\right)}_{\text{(iii) detection and isolation}} \quad (8)$$

425 With  $\mathcal{A}_{t_{final}} = I_{t_{final}}^{tot}/S_0$ ,  $\mathcal{B}_{t_{final}} = 1 - R_{0,t_{final}}/R_{0,t_{init}}$ , and

426 
$$\mathcal{C}_{t_{final}} = c_{t_{final}} \sum_{t_d=0}^{\infty} y(t_d) (\sum_{\tau=t_d+1}^{\infty} w(\tau)).$$

427 Parameter estimates

428 We fix the distributions of the generation time  $w(\tau)$ , the distribution of time from infection to  
 429 death  $x(\tau)$ , the distribution from infection to detection  $y(\tau)$ , and the infection fatality ratio  $d$   
 430 to values estimated previously.

| Parameter                                            | Symbol    | Value                                                                                                                | Reference |
|------------------------------------------------------|-----------|----------------------------------------------------------------------------------------------------------------------|-----------|
| Distribution of generation time                      | $w(\tau)$ | Log-normal(1.77, 0.888)<br>Mean 7 days<br>SD 4.5 days                                                                | (9,16,30) |
| Distribution of time from infection to symptom onset | -         | Log-normal(1.518, 0.472)                                                                                             | (13)      |
| Distribution of time from infection to death         | $x(\tau)$ | Calculated by convoluting distribution from infection to onset and from onset to death. The latter is Gamma(5, 0.25) | (9)       |
| Distribution of time from infection to detection     | $y(\tau)$ | Calculated by convoluting distribution from infection to onset and from onset to detection                           | (13)      |
| Infection fatality ratio                             | $d$       | Depends on the age structure of the country, around 1% on average                                                    | (8)       |
| Probability of detection                             | $c_t$     | Inferred                                                                                                             | -         |
| Transmissibility                                     | $R_{0,t}$ | Inferred                                                                                                             | -         |

431 Table 2: Summary of model parameters

432 *Generation time*

433 We assume the generation time is lognormally distributed with mean 7 days and standard  
 434 deviation 4.5 days (9) (Supplementary Fig. 4). This is the generation time when the infected  
 435 individual is not tested. A positive test is assumed to be followed by perfect isolation of the  
 436 infected individual and interruption of transmission. This effectively truncates the distribution

437 of generation time (Fig. 4A). Two factors make estimation of this generation time difficult:  
438 first, the generation time, the time from an infection to another infection, is often approximated  
439 by the serial interval, the time between symptom onset in an infector and symptom onset in the  
440 infectee. These two quantities have the same mean, but the variance of the generation time  
441 should in general be smaller than that of the serial interval (31). Second, measuring the serial  
442 interval requires to identify infectees and their infectors. The fact that the infector needs to be  
443 identified could bias the serial interval towards lower values. For example, in a large study in  
444 the Shenzhen province in China, the serial interval had mean 6.3 days overall and 8.1 days if  
445 the infector was isolated more than two days after infection (16). Thus, in settings where most  
446 infections are undocumented, the typical serial interval (and generation time) may be longer  
447 than that estimated in other work (e.g. mean 5 days in (5)), motivating the mean of 7 days  
448 chosen here.

449 Note that the chosen serial interval distribution affects the absolute value of the basic  
450 reproduction number, but does not affect either the inferred temporal trend in basic  
451 reproduction number or the absolute value of the probability of detection.

#### 452 *Time from infection to detection*

453 The time from symptom onset to case detection was inferred from published data on 150 cases  
454 from various countries (13). We used the time between the midpoint date of symptom onset  
455 and the midpoint date of case detection. We excluded 31 cases for which the date of case  
456 detection was not available or there was very large uncertainty on the date of symptom onset.  
457 We inferred that the time from symptom onset to detection was gamma-distributed with mean  
458 2.2 days [95% CI 1.6-3.2] and SD 2.7 days [2.0-3.8] (shape 0.69 [0.55-0.82] and rate 3.2 [2.5,  
459 4.5]). The fit of a Weibull distribution was comparable to that of the gamma (Supplementary  
460 Fig. 5).

461 The distribution of time from infection to detection was computed from the convolution of the  
462 distribution of time from infection to symptom onset (13), and our inferred distribution of time  
463 from symptom onset to case detection, assuming independence of the two times. The  
464 distribution of time from infection to symptom onset has mean 5 to 6 days (Supplementary Fig.  
465 6).

#### 466 *Time from infection to death*

467 The distribution of the time from infection to death was estimated using data from 41 patients  
468 in Wuhan analysed elsewhere (12). The time from symptom onset to death was gamma-



469 distributed with a mean of 20 days and a standard deviation of 10 days. This estimate is close  
470 to that of other studies (24 deceased cases from mainland China, mean and SD of time from  
471 onset to deaths 18.8 / 8.5 days (8); 34 deceased cases from mainland China, mean and SD 20.2  
472 /11.6 days (32).

#### 473 *Infection fatality ratio*

474 For each region studied, we computed an overall infection fatality ratio that takes into account  
475 the age pyramid of the country. To this end, we used the infection fatality ratio (IFR) estimated  
476 in nine age classes, [0, 9], [10, 19], etc., [80+] in mainland China (8). Other estimates similarly  
477 stratified by age, for mainland China and for France, are very similar (Supplementary Fig. 1).  
478 The IFR climbs from close to 0% in 0 to 39 years old, up to 5 to 10% in individuals aged 80  
479 years old or more.

#### 480 Likelihood method:

481 To fit the model and infer transmission and case detection parameters, we use data on the  
482 number of confirmed cases over time and the number of deaths over time in 79 states and  
483 countries from different public sources detailed below. We include all states and countries that  
484 had a daily incidence of 10 deaths or more at least once as of 23th April. As we want to estimate  
485 the impact of sudden social distancing measures in an essentially uncontrolled epidemic, we  
486 exclude South Korea and Japan from the analysis. In these two countries, SARS-CoV-2 was  
487 introduced earlier and strong control measures including social distancing and contact tracing  
488 were immediately in place.

489 Simulating the deterministic model gives the expected number of detected cases  $C(t)$  and  
490 deaths  $D(t)$  at time  $t$  as a function of model parameters. We assume that the probability to  
491 observe a certain number of cases (resp. deaths) in the data at day  $t$  is the density of a negative  
492 binomial distribution with mean given by the theoretical predictions for cases (resp. deaths),  
493 and dispersion parameters that we infer. The overall likelihood is the product of these  
494 probabilities over all days. For the number of deaths, we include the period from the first day  
495 to the last day when at least 1 death and 5 cases were recorded. For the number of cases, we  
496 include the period from the first day to the last day when at least 5 cases were recorded.

497 We mainly estimate the time-changing transmissibility  $R_{0,t}$  and the time-changing probability  
498 of detection  $c_t$ .

499 For the time-changing transmissibility, we fit two functional forms. First we assume that  $R_{0,t}$   
 500 is a step function with a sharp transition from a high pre-control value to a low post-control  
 501 value, at a fixed date  $t_{control}$  corresponding to the date of implementation of the control  
 502 measure:

$$503 \quad R_{0,t} = R_{0,pre} \text{ if } t < t_{control} \quad (9a)$$

$$504 \quad R_{0,t} = R_{0,post} \text{ if } t \geq t_{control} \quad (9b)$$

505 For the sharp change in transmissibility, we infer the two values  $R_{0,pre}$  and  $R_{0,post}$ .  
 506 Furthermore, to investigate the possibility that transmissibility changed in a more gradual way,  
 507 we assume  $R_{0,t}$  is a smooth declining sigmoid function:

$$508 \quad R_{0,t} = R_{0,pre} + \frac{R_{0,post} - R_{0,pre}}{1 + e^{-k_R(t - t_R)}} \quad (10)$$

509 Where  $R_{0,pre}$  is the basic reproductive number before social distancing measures,  $R_{0,post}$  is the  
 510 basic reproductive number after social distancing,  $k_R$  is the steepness of the logistic curve, and  
 511  $t_R$  is the time when the basic reproductive number is intermediate between  $R_{0,pre}$  and  $R_{0,post}$ .  
 512 The step function is a special case of the logistic when  $k$  is large and  $t_R = t_{lockdown}$ . For the  
 513 smooth change in transmissibility, we infer the two values  $R_{0,pre}$  and  $R_{0,post}$ , the steepness  $k_R$   
 514 and the time  $t_R$ .

515 For the time-changing detection probability, we assume an increasing logistic function:

$$516 \quad c_t = c_{min} + \frac{c_{max} - c_{min}}{1 + e^{-k_C(t - t_C)}} \quad (11)$$

517 We infer the four parameters  $c_{min}$ ,  $c_{max}$ ,  $k_C$  and  $t_C$ . Note that we constrain the parameter  $c_{min}$ ,  
 518 the initial probability of detection, to be small, in  $[0.0001, 0.001]$ . We fit three models: (i) a  
 519 model based on death data only with the step function of transmissibility, (ii) a model based  
 520 on death and case data with the step transmissibility function; and (iii) a model based on death  
 521 and case data with the smooth transmissibility function. These three models are fitted by  
 522 maximum likelihood. We first find an optimal likelihood value by 50 iterations of the Nelder-  
 523 Mead algorithm starting from different initial parameters. We then run a Markov chain Monte  
 524 Carlo (MCMC) sampling of the likelihood function with bounded parameters (equivalent to  
 525 uniform priors for all parameters in a Bayesian framework). We let the chain run for  $10^6$  steps  
 526 and record the parameter values from  $2 \times 10^5$  to  $10^6$  steps. This sample is used both for  
 527 maximum likelihood parameters (if a better parameter set is found than with the Nelder-Mead  
 528 algorithm) and for confidence intervals.

529 Symptom-based test model

530 *The model*

531 We relate the fraction of infected individuals detected to the number of daily RT-PCR tests  
532 performed and the incidence of infection. Each day, the testable individuals seeking care are  
533 composed of two populations:

534 - SARS-CoV-2 infected individuals. The number of such individuals is time-varying and is  
535 denoted by  $P_t = \sum_{\tau=0}^{\infty} y(\tau) I(t, \tau)$  where  $y(\tau)$  is the probability that an individual is detected  
536 at age of infection  $\tau$  (given that it is detected) (Fig. 5A).

537 - Non-SARS-CoV-2 infected individuals. The number of such individuals is assumed to be  
538 constant and is denoted by  $N$ . We acknowledge that a more complete model would allow for  
539 this number to vary in time, for example to account for seasonal infections by respiratory  
540 diseases like influenza or seasonal coronavirus that may contribute to the pool of testable  
541 individuals.

542 We assume that contexts in which we apply our model are characterized by a number of tests  
543 smaller than the number of testable individuals,  $T_t < P_t + N$  where  $T_t$  is the number of tests  
544 available at time  $t$ . Thus the  $T_t$  tests are prioritised on the subset of individuals most likely to  
545 be infected by SARS-CoV-2. Individuals presenting to health centers with symptoms  
546 suggestive of SARS-CoV-2 are characterised by a score such that the probability of SARS-  
547 COV-2 infection increases with the score. Given the limited number of tests available each  
548 day, a threshold score is defined and tests are performed only for patients above this score.  
549 Formally, denoting by  $\phi_{P_t}(s)$  and  $\phi_N(s)$  the distribution of the score  $s$  in infected and  
550 uninfected individuals, the (time-varying) threshold score  $s_{max}$  is the solution of:

551 
$$T_t = \int_{s_{max}}^{+\infty} [\phi_{P_t}(s)P_t + \phi_N(s)N] ds \quad (12)$$

552 In the absence of detailed information on the choice of individuals to test in different regions  
553 at different stages of the pandemic, we further assume for simplicity that the scores are  
554 distributed exponentially. We set the rate of the exponential distribution  $\phi_{P_t}$  to 1 without loss  
555 of generality, and we denote  $\gamma > 1$  the rate of  $\phi_N$ :

556 
$$\phi_{P_t}(s) = e^{-s} \quad (13a)$$

557 
$$\phi_N(s) = \gamma e^{-\gamma s} \quad (13b)$$

558 The fact that  $\gamma > 1$  guarantees that the probability that an individual is positive increases with  
 559 the score. Plugging the distributions (13) in the implicit formula to define the threshold score  
 560  $s_{max}$  (12) yields:

$$561 \quad T_t = P_t e^{-s_{max}} + N e^{-\gamma s_{max}} \quad (14)$$

562 The probability of detection  $c_t$ , defined as the ratio between positive tests results and the  
 563 number of testable infected individuals  $P_t$ , is the area of the  $\phi_{P_t}$  distribution above the threshold  
 564  $s_{max}$ :

$$565 \quad c_t = \frac{1}{P_t} \int_{s_{max}}^{\infty} \phi_{P_t}(s) P_t ds = e^{-s_{max}} \quad (15)$$

566 Replacing with equation (15) in equation (14), we find that  $c_t$  is the solution of:

$$567 \quad T_t = c_t P_t + c_t^\gamma N \quad (16)$$

568 This generally defines an implicit function  $c_t(T_t, P_t)$  of the number of testable infected at day  
 569  $t$ ,  $P_t$  and the number of available tests  $T_t$ . We can simplify this general solution in two ways.  
 570 First, in the limit when the number of infected  $P_t$  is much smaller than the number of uninfected  
 571  $N$ , and  $\gamma$  is not too large, the probability of detection is:

$$572 \quad c_t \approx \left(\frac{T_t}{N}\right)^{\frac{1}{\gamma}} \quad (17a)$$

573 That is, the probability of detection increases as a root function of the normalised number of  
 574 tests. In general, when the number of testable infected individuals  $P_t$  is not negligible, the  
 575 solution  $c_t$  of equation (16) decreases with  $P_t$ . When the number of testable infected individuals  
 576  $P_t$  is small, the solution (17a) can be better approximated by:

$$577 \quad c_t \approx \left(\frac{T_t}{N}\right)^{\frac{1}{\gamma}} - P_t \frac{1}{\gamma T_t} \left(\frac{T_t}{N}\right)^{\frac{2}{\gamma}} \quad (17b)$$

578 In this approximation the probability of detection decreases linearly with the number of  
 579 infected  $P_t$ .

### 580 *Parameter inference*

581 We verify the model predictions using the inferred probability of detection  $c_t$  together with  
 582 data on the daily number of tests  $T_t$ , and the number of testable infected individuals  $P_t$  inferred  
 583 from the dynamical model in different regions. We used the *nls* method from the *stats* package  
 584 in the software R (33).

585 First, we use the general solution of equation (16). This solution is a non-linear function  
586  $c_t(T_t, P_t)$  with parameters  $N$  and  $\gamma$ . We infer the parameters  $N$  and  $\gamma$  by minimizing the mean  
587 square error between the inferred  $c_t$  and the prediction. In most cases (except, notably New  
588 York and New Jersey states) the coefficient of determination was as good with the  
589 simplification of the model where  $c_t$  is approximated as a root function of  $T_t$  only  
590 (equation(17a)) (Supplementary Fig. 8). The general solution improved the fit all the more than  
591 the the attack rate was larger, as predicted by the model (Supplementary Fig. 8).

592 **Data sources**

593 **Epidemiological data:**

594 For France, we used data from OpenCOVID19 available at [https://github.com/opencovid19-](https://github.com/opencovid19-fr/data)  
595 [fr/data](https://github.com/opencovid19-fr/data). This website curates data from *Agence nationale de santé publique*, the French  
596 governmental public health agency.

597 For Italy, we used data from the Civil Protection Department (Dipartimento della Protezione  
598 Civile), available at <https://github.com/pcm-dpc/COVID-19>. This data includes daily cases  
599 and deaths, and daily number of tests.

600 For other European countries, we used data from the European Center for Disease Control  
601 (ECDC) available at <https://opendata.ecdc.europa.eu/covid19/casedistribution/>

602 For American states, we used data from the COVID Tracking Project that compiles data from  
603 American official sources, available at <https://covidtracking.com/api/v1/states/daily.csv>. This  
604 data includes daily cases and deaths, and daily number of tests.

605 For other countries, we used data from the Center for Systems Science and Engineering  
606 (CSSE) at Johns Hopkins University (JHU), available at  
607 <https://github.com/CSSEGISandData/COVID-19>

608 Daily number of tests data for regions other than Italy and American state were compiled  
609 from Our World in Data at <https://covid.ourworldindata.org/data/owid-covid-data.csv>

610 We considered test data only for regions for which the number of tests was strictly superior to  
611 the number of cases recorded for at least 80% of the days. The reported number of tests are  
612 sometimes exactly equal to the number of cases that day, indicating that negative tests are not  
613 reported. Since we ignore whether negative tests are not reported or reported at a later date (as  
614 sometimes suggested by a peak in the number of reported tests a few days after), we exclude  
615 these datapoints and exclude regions where this artefact is often observed.

616 **Age structure data:**

617 We collected data on the number of individuals in age categories 0-9, 10-19, ..., 80+, for  
618 different states and countries, from the following sources:

| Region                | Source                              | Web address (accessed 04/09/2020)                                                                                                                                                                                                                                                                                                                                                                                                                                                                                   |
|-----------------------|-------------------------------------|---------------------------------------------------------------------------------------------------------------------------------------------------------------------------------------------------------------------------------------------------------------------------------------------------------------------------------------------------------------------------------------------------------------------------------------------------------------------------------------------------------------------|
| USA                   | US Census bureau                    | <a href="https://population.un.org/wpp/Download/Files/1_Indicators%20(Standard)/EXCEL_FILES/1_Population/WPP2019_POP_F07_I_POPULATION_BY_AGE_BOTH_SEXES.xlsx">https://population.un.org/wpp/Download/Files/1_Indicators%20(Standard)/EXCEL_FILES/1_Population/WPP2019_POP_F07_I_POPULATION_BY_AGE_BOTH_SEXES.xlsx</a>                                                                                                                                                                                               |
| Quebec                | Canadian government                 | <a href="https://stat.gouv.qc.ca/statistiques/population-demographie/structure/population-quebec-age-sexe.html#tri_pop=10">https://stat.gouv.qc.ca/statistiques/population-demographie/structure/population-quebec-age-sexe.html#tri_pop=10</a>                                                                                                                                                                                                                                                                     |
| British Columbia      | Canadian government                 | <a href="https://www12.statcan.gc.ca/census-recensement/2016/dp-pd/prof/details/page.cfm?Lang=E&amp;Geo1=PR&amp;Code1=59&amp;Geo2=PR&amp;Code2=01&amp;SearchText=Canada&amp;SearchType=Begins&amp;SearchPR=01&amp;B1=All&amp;type=0">https://www12.statcan.gc.ca/census-recensement/2016/dp-pd/prof/details/page.cfm?Lang=E&amp;Geo1=PR&amp;Code1=59&amp;Geo2=PR&amp;Code2=01&amp;SearchText=Canada&amp;SearchType=Begins&amp;SearchPR=01&amp;B1=All&amp;type=0</a>                                                 |
| Ontario               | Canadian government                 | <a href="https://www12.statcan.gc.ca/census-recensement/2016/dp-pd/prof/details/page.cfm?Lang=E&amp;Geo1=PR&amp;Code1=35&amp;Geo2=PR&amp;Code2=01&amp;Data=Count&amp;SearchText=35&amp;SearchType=Begins&amp;SearchPR=01&amp;B1=All&amp;Custom=&amp;TABID=3">https://www12.statcan.gc.ca/census-recensement/2016/dp-pd/prof/details/page.cfm?Lang=E&amp;Geo1=PR&amp;Code1=35&amp;Geo2=PR&amp;Code2=01&amp;Data=Count&amp;SearchText=35&amp;SearchType=Begins&amp;SearchPR=01&amp;B1=All&amp;Custom=&amp;TABID=3</a> |
| Hubei province, China | China National Bureau of Statistics | <a href="https://www.citypopulation.de/en/china/admin/42_hubei/">https://www.citypopulation.de/en/china/admin/42_hubei/</a>                                                                                                                                                                                                                                                                                                                                                                                         |
| All others            | United Nations                      | <a href="https://population.un.org/wpp/Download/Files/1_Indicators%20(Standard)/EXCEL_FILES/1_Population/WPP2019_POP_F07_I_POPULATION_BY_AGE_BOTH_SEXES.xlsx">https://population.un.org/wpp/Download/Files/1_Indicators%20(Standard)/EXCEL_FILES/1_Population/WPP2019_POP_F07_I_POPULATION_BY_AGE_BOTH_SEXES.xlsx</a> accessed                                                                                                                                                                                      |

619

620 **Mobility data:**

621 We used Google mobility data available at <https://www.google.com/covid19/mobility/>

622 **Data availability:**

623 Code and data is available on [https://github.com/FrancoisBlanquart/covid\\_model](https://github.com/FrancoisBlanquart/covid_model)

624 **Acknowledgements:**

625 We thank Florence Débarre for helpful comments. We thank the many people involved in the  
626 collection and curation of the epidemiological data that we use. F.B. was supported by a  
627 Momentum grant from the CNRS. A.B was supported by a scholarship from Ecole  
628 Polytechnique.

629 **Competing interests:**

630 None.

631

632 **Bibliography**

- 633 1. Rambaut A. Phylodynamic Analysis| 176 genomes| 6 Mar 2020. *Virological*  
634 *Orgtphylodynamic-Anal-176-Genomes-6-Mar-2020*356 Accessed. 2020;15.
- 635 2. Li Q, Guan X, Wu P, Wang X, Zhou L, Tong Y, et al. Early Transmission Dynamics in  
636 Wuhan, China, of Novel Coronavirus–Infected Pneumonia. *N Engl J Med*. 2020 Mar  
637 26;382(13):1199–207.
- 638 3. Kucharski AJ, Russell TW, Diamond C, Liu Y, Edmunds J, Funk S, et al. Early  
639 dynamics of transmission and control of COVID-19: a mathematical modelling study.  
640 *Lancet Infect Dis*. 2020 May 1;20(5):553–8.
- 641 4. Riou J, Althaus CL. Pattern of early human-to-human transmission of Wuhan 2019  
642 novel coronavirus (2019-nCoV), December 2019 to January 2020. *Eurosurveillance*  
643 [Internet]. 2020 Jan 30 [cited 2020 Jul 28];25(4). Available from:  
644 <https://www.eurosurveillance.org/content/10.2807/1560-7917.ES.2020.25.4.2000058>
- 645 5. Ferretti L, Wymant C, Kendall M, Zhao L, Nurtay A, Abeler-Dörner L, et al.  
646 Quantifying SARS-CoV-2 transmission suggests epidemic control with digital contact  
647 tracing. *Science* [Internet]. 2020 May 8 [cited 2020 Jun 24];368(6491). Available from:  
648 <https://science.sciencemag.org/content/368/6491/eabb6936>
- 649 6. Casey M, Griffin J, McAloon CG, Byrne AW, Madden JM, McEvoy D, et al. Pre-  
650 symptomatic transmission of SARS-CoV-2 infection: a secondary analysis using  
651 published data. *medRxiv*. 2020 Jun 11;2020.05.08.20094870.
- 652 7. Salje H, Kiem CT, Lefrancq N, Courtejoie N, Bosetti P, Paireau J, et al. Estimating the  
653 burden of SARS-CoV-2 in France. *Science* [Internet]. 2020 May 13 [cited 2020 Jun 24];  
654 Available from:  
655 <https://science.sciencemag.org/content/early/2020/05/12/science.abc3517>
- 656 8. Verity R, Okell LC, Dorigatti I, Winskill P, Whittaker C, Imai N, et al. Estimates of the  
657 severity of coronavirus disease 2019: a model-based analysis. *Lancet Infect Dis*  
658 [Internet]. 2020 Mar 30 [cited 2020 Apr 7];0(0). Available from:  
659 [https://www.thelancet.com/journals/laninf/article/PIIS1473-3099\(20\)30243-7/abstract](https://www.thelancet.com/journals/laninf/article/PIIS1473-3099(20)30243-7/abstract)
- 660 9. Wu JT, Leung K, Bushman M, Kishore N, Niehus R, de Salazar PM, et al. Estimating  
661 clinical severity of COVID-19 from the transmission dynamics in Wuhan, China. *Nat*  
662 *Med*. 2020 Apr;26(4):506–10.
- 663 10. Hauser A, Counotte MJ, Margossian CC, Konstantinoudis G, Low N, Althaus CL, et al.  
664 Estimation of SARS-CoV-2 mortality during the early stages of an epidemic: a  
665 modeling study in Hubei, China, and six regions in Europe. *medRxiv*. 2020 Jul  
666 12;2020.03.04.20031104.
- 667 11. Flaxman S, Mishra S, Gandy A, Unwin HJT, Mellan TA, Coupland H, et al. Estimating  
668 the effects of non-pharmaceutical interventions on COVID-19 in Europe. *Nature*. 2020  
669 Jun 8;1–8.

- 670 12. Wu JT, Leung K, Bushman M, Kishore N, Niehus R, Salazar PM de, et al. Estimating  
671 clinical severity of COVID-19 from the transmission dynamics in Wuhan, China. *Nat*  
672 *Med*. 2020 Mar 19;1–5.
- 673 13. Lauer SA, Grantz KH, Bi Q, Jones FK, Zheng Q, Meredith HR, et al. The Incubation  
674 Period of Coronavirus Disease 2019 (COVID-19) From Publicly Reported Confirmed  
675 Cases: Estimation and Application. *Ann Intern Med*. 2020 Mar 10;172(9):577–82.
- 676 14. Long Q-X, Liu B-Z, Deng H-J, Wu G-C, Deng K, Chen Y-K, et al. Antibody responses  
677 to SARS-CoV-2 in patients with COVID-19. *Nat Med*. 2020 Jun;26(6):845–8.
- 678 15. Kucirka LM, Lauer SA, Laeyendecker O, Boon D, Lessler J. Variation in False-  
679 Negative Rate of Reverse Transcriptase Polymerase Chain Reaction–Based SARS-  
680 CoV-2 Tests by Time Since Exposure. *Ann Intern Med* [Internet]. 2020 May 13 [cited  
681 2020 Jun 24]; Available from: <https://www.acpjournals.org/doi/10.7326/M20-1495>
- 682 16. Bi Q, Wu Y, Mei S, Ye C, Zou X, Zhang Z, et al. Epidemiology and transmission of  
683 COVID-19 in 391 cases and 1286 of their close contacts in Shenzhen, China: a  
684 retrospective cohort study. *Lancet Infect Dis* [Internet]. 2020 Apr 27 [cited 2020 Jun  
685 24]; Available from:  
686 <http://www.sciencedirect.com/science/article/pii/S1473309920302875>
- 687 17. Ali ST, Wang L, Lau EHY, Xu X-K, Du Z, Wu Y, et al. Serial interval of SARS-CoV-2  
688 was shortened over time by nonpharmaceutical interventions. *Science* [Internet]. 2020  
689 Jul 21 [cited 2020 Jul 31]; Available from:  
690 <https://science.sciencemag.org/content/early/2020/07/20/science.abc9004>
- 691 18. Unwin HJT, Mishra S, Bradley VC, Gandy A, Vollmer M, Mellan T, et al. State-level  
692 tracking of COVID-19 in the United States. 2020 May 20 [cited 2020 Jun 26]; Available  
693 from: <https://openreview.net/forum?id=NuBV0oSnIh&noteId=wcYAXeS-Why>
- 694 19. Miller AC, Foti NJ, Lewnard JA, Jewell NP, Guestrin C, Fox EB. Mobility trends  
695 provide a leading indicator of changes in SARS-CoV-2 transmission. *medRxiv*. 2020  
696 May 11;2020.05.07.20094441.
- 697 20. Pellis L, Cauchemez S, Ferguson NM, Fraser C. Systematic selection between age and  
698 household structure for models aimed at emerging epidemic predictions. *Nat Commun*.  
699 2020 Feb 14;11(1):906.
- 700 21. Gostic KM, McGough L, Baskerville E, Abbott S, Joshi K, Tedijanto C, et al. Practical  
701 considerations for measuring the effective reproductive number, Rt. *medRxiv*. 2020 Jun  
702 23;2020.06.18.20134858.
- 703 22. Cori A, Ferguson NM, Fraser C, Cauchemez S. A New Framework and Software to  
704 Estimate Time-Varying Reproduction Numbers During Epidemics. *Am J Epidemiol*.  
705 2013 Nov 1;178(9):1505–12.
- 706 23. Russell TW, Golding N, Hellewell J, Abbott S, Pearson CAB, van Zandvoort K, et al.  
707 Reconstructing the global dynamics of unreported COVID-19 cases and infections |  
708 CMMID Repository [Internet]. [cited 2020 Jul 31]. Available from:  
709 <https://cmmid.github.io/topics/covid19/Under-Reporting.html>



- 710 24. Jing Q-L, Liu M-J, Yuan J, Zhang Z-B, Zhang A-R, Dean NE, et al. Household  
711 Secondary Attack Rate of COVID-19 and Associated Determinants. medRxiv. 2020  
712 Apr 15;2020.04.11.20056010.
- 713 25. Li W, Zhang B, Lu J, Liu S, Chang Z, Peng C, et al. Characteristics of Household  
714 Transmission of COVID-19. Clin Infect Dis [Internet]. [cited 2020 Jul 31]; Available  
715 from: <https://academic.oup.com/cid/article/doi/10.1093/cid/ciaa450/5821281>
- 716 26. Hellewell J, Abbott S, Gimma A, Bosse NI, Jarvis CI, Russell TW, et al. Feasibility of  
717 controlling COVID-19 outbreaks by isolation of cases and contacts. Lancet Glob  
718 Health. 2020 Apr 1;8(4):e488–96.
- 719 27. Nouvellet P, Bhatia S, Cori A, Ainslie K, Baguelin M, Bhatt S, et al. Report 26:  
720 Reduction in mobility and COVID-19 transmission.
- 721 28. Clipman SJ, Wesolowski AP, Gibson DG, Agarwal S, Lambrou AS, Kirk GD, et al.  
722 Rapid real-time tracking of non-pharmaceutical interventions and their association with  
723 SARS-CoV-2 positivity: The COVID-19 Pandemic Pulse Study. Clin Infect Dis  
724 [Internet]. [cited 2020 Sep 5]; Available from: [https://academic.oup.com/cid/advance-](https://academic.oup.com/cid/advance-article/doi/10.1093/cid/ciaa1313/5900759)  
725 [article/doi/10.1093/cid/ciaa1313/5900759](https://academic.oup.com/cid/advance-article/doi/10.1093/cid/ciaa1313/5900759)
- 726 29. Grassly NC, Pons-Salort M, Parker EPK, White PJ, Ferguson NM, Ainslie K, et al.  
727 Comparison of molecular testing strategies for COVID-19 control: a mathematical  
728 modelling study. Lancet Infect Dis [Internet]. 2020 Aug 18 [cited 2020 Aug 27];  
729 Available from: <http://www.sciencedirect.com/science/article/pii/S1473309920306307>
- 730 30. Ma S, Zhang J, Zeng M, Yun Q, Guo W, Zheng Y, et al. Epidemiological parameters of  
731 coronavirus disease 2019: a pooled analysis of publicly reported individual data of 1155  
732 cases from seven countries. medRxiv. 2020 Mar 24;2020.03.21.20040329.
- 733 31. Britton T, Scalia Tomba G. Estimation in emerging epidemics: biases and remedies. J R  
734 Soc Interface [Internet]. 2019 Jan [cited 2020 Jul 21];16(150). Available from:  
735 <https://www.ncbi.nlm.nih.gov/pmc/articles/PMC6364646/>
- 736 32. Linton NM, Kobayashi T, Yang Y, Hayashi K, Akhmetzhanov AR, Jung S, et al.  
737 Incubation Period and Other Epidemiological Characteristics of 2019 Novel  
738 Coronavirus Infections with Right Truncation: A Statistical Analysis of Publicly  
739 Available Case Data. J Clin Med. 2020 Feb;9(2):538.
- 740 33. R Core Team. R: A Language and Environment for Statistical Computing. Vienna,  
741 Austria: R Foundation for Statistical Computing; 2018.

742

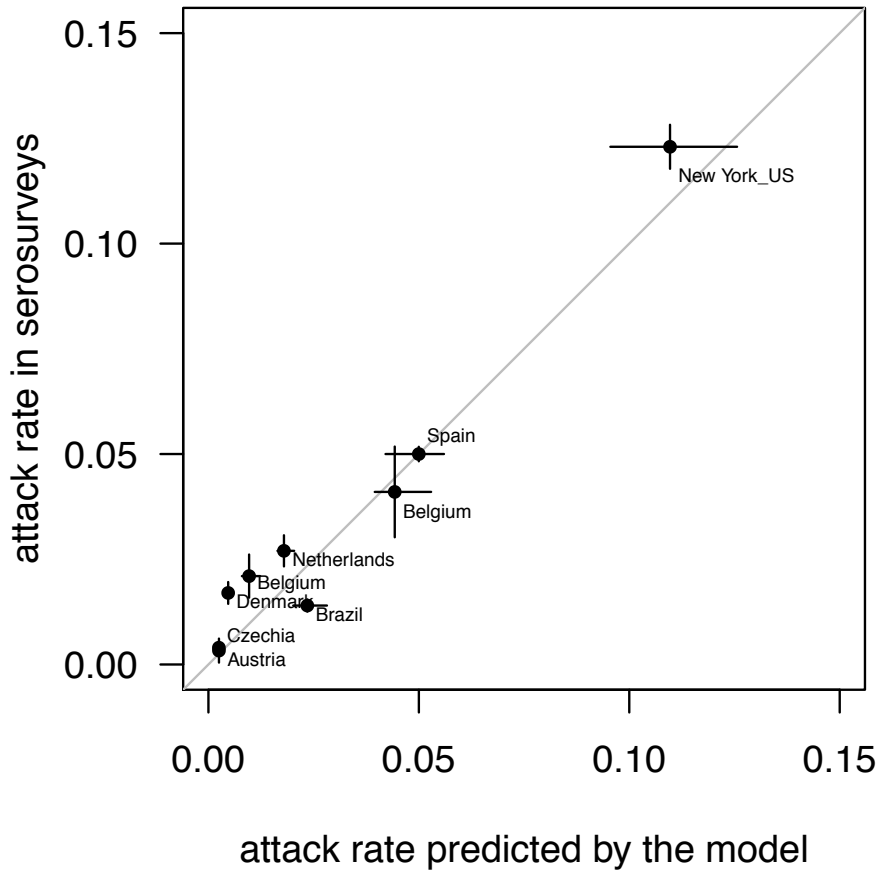

Figure 1: Comparison of the total number of infected (attack rate) found in systematic serological test surveys with that predicted by our model. The segments are 95% confidence intervals (for the data, binomial confidence intervals; for the model, estimated from the MCMC sample). We used the model with the smooth sigmoid reduction in transmission; the model with the sharp transition gave very similar results.

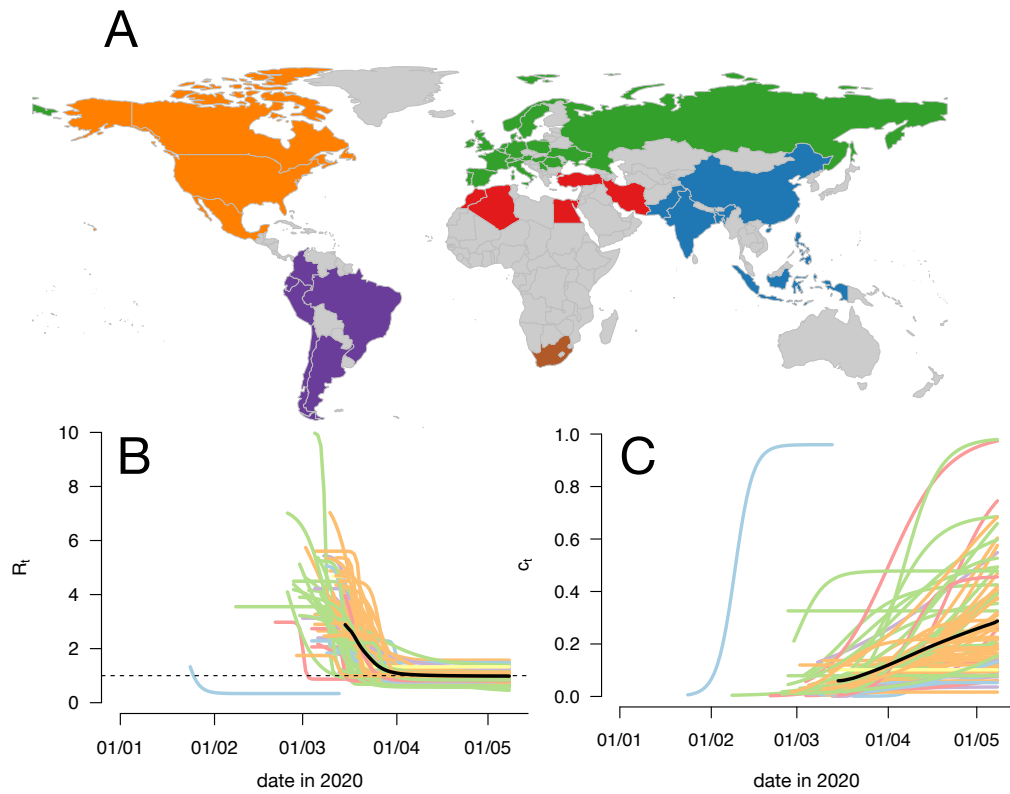

Figure 2: **Panel A** shows the map of the regions considered in this study, colored by geographic areas (Europe+Russia, North Africa/Middle East, Asia, South Africa, Central-South America, North America). The USA are represented by 33 states. China is represented by the Hubei province. **Panels B, C** show the inferred transmissibility and the probability of detection as a function of time for all regions. The overall mean is a thick black line. The early blue trajectory is that of the Hubei province in China.



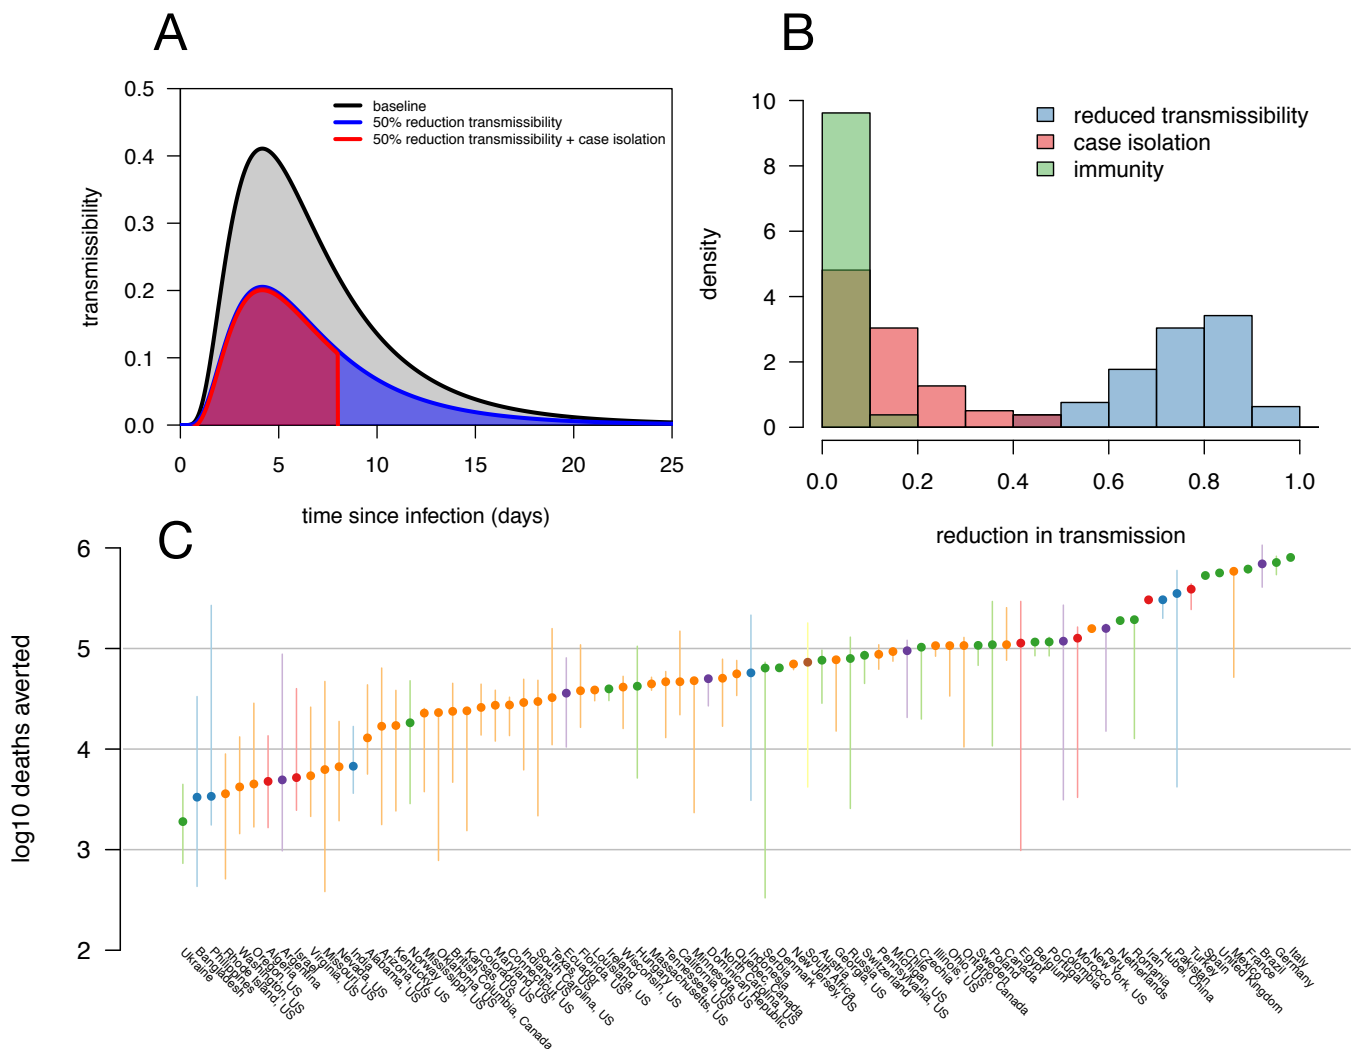

Figure 4: **Impact of control measures and immunity on transmission dynamics.** **Panel A** illustrates how social distancing and case isolation reduce transmission of the disease. The basic reproduction number is given by the area under the curve. A reduction in transmissibility uniformly reduces the  $R_t$  (blue curve and area), while detection and case isolation truncates the serial interval (red curve). **Panel B** represents the distribution of the reduction in transmission caused by social distancing (blue), detection and isolation (red) and immunity of already infected individuals (green) across the 79 regions. **Panel C** represents the log<sub>10</sub> number of deaths averted by social distancing between the beginning of the epidemic and the 8th May 2020.

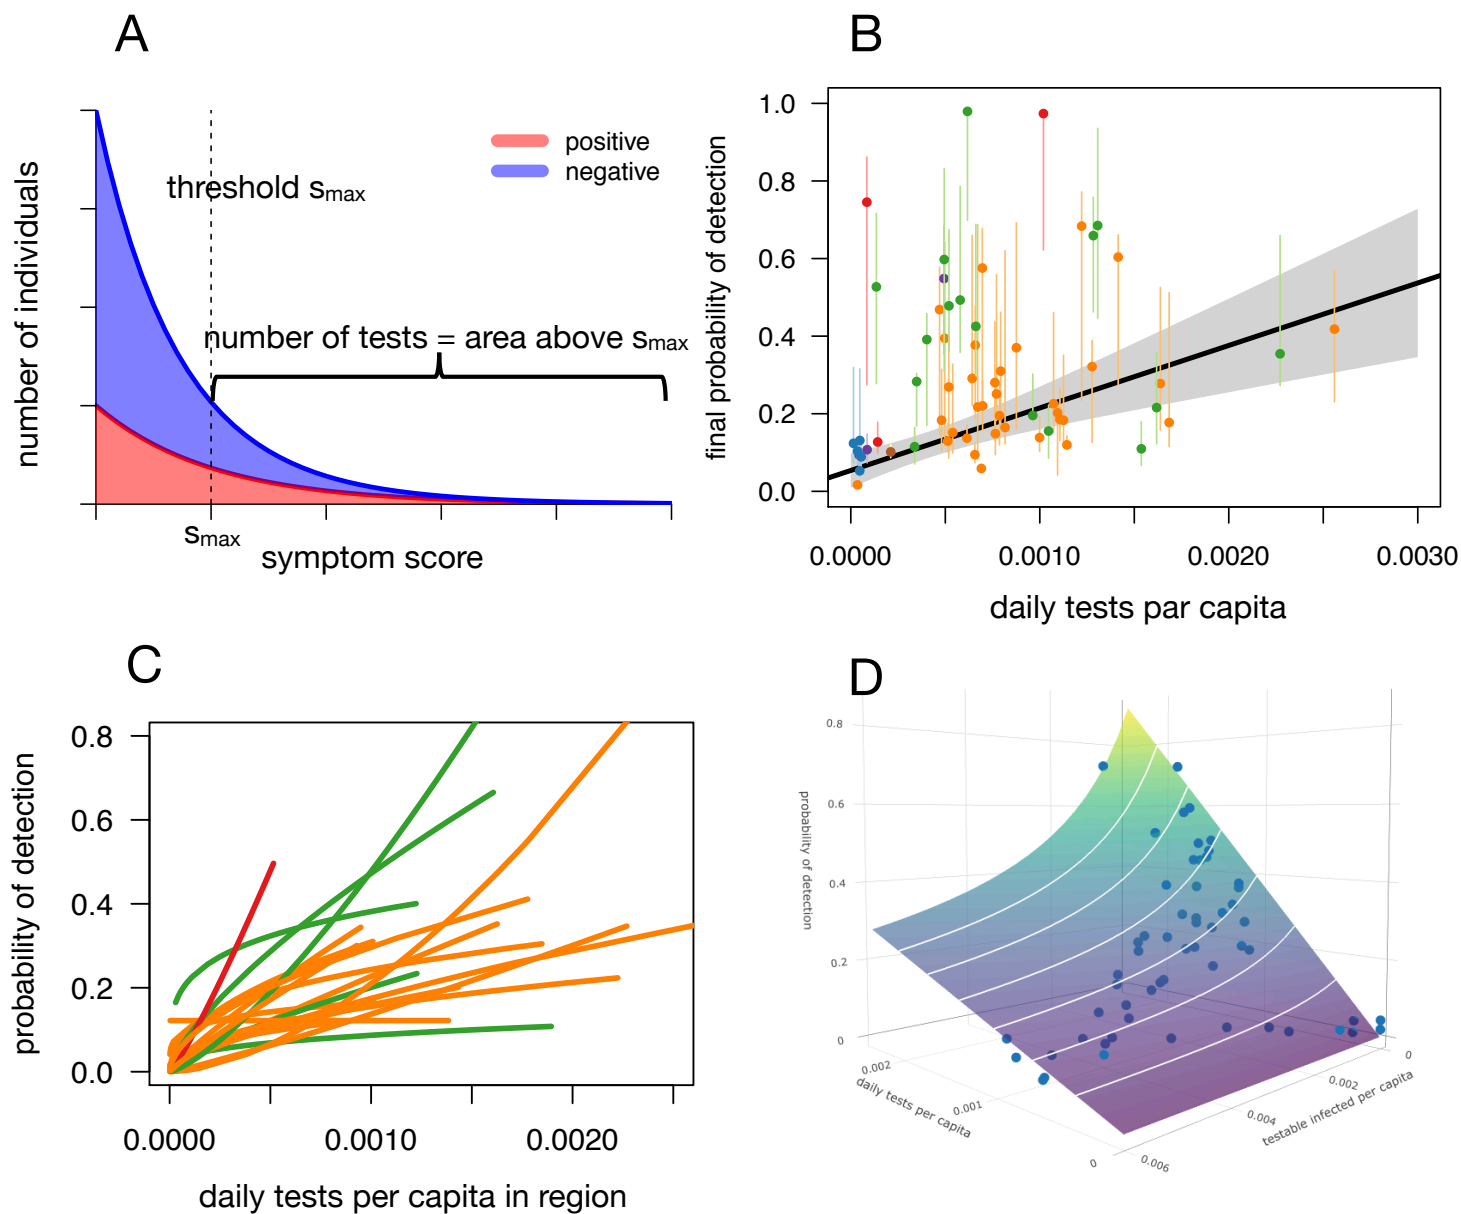

Figure 5: **Relationship between probability of detection and number of tests.** **Panel A** shows stacked distributions of the disease score for positive (red) and negative (blue) individuals. The fraction of positive individuals increases with the score. The number of tests performed is the area to the right of the threshold (vertical line). **Panel B** represents the final probability of detection as a function of number of daily tests per capita (over the 7 days preceding 8th May) for the 62 regions with available test data. **Panel C** shows the predicted root-function relationship between proportion of detected and daily tests for the 33 regions with sufficient available test data. **Panel D** shows the proportion of detected a function of daily tests and the number of testable infected presenting for a test, for the New York state (one of the high-prevalence states where the proportion detected declines with the number of infected as predicted at high prevalence).
